# Supplementary material
Source: MDPI journal article supplement (https://www.mdpi.com/2073-4441/11/4/783)

| INPUT DATA                            |       |                |
|---------------------------------------|-------|----------------|
| Connected roof Area                   | 139   | m <sup>2</sup> |
| In-house daily demand                 | 103.3 | L              |
| Tank sizes selected for consideration |       |                |
| Smallest tank volume                  | 500   | L              |
| Largest tank volume                   | 5000  | L              |

| Output                  |                           |                                                 |                                         |                      |
|-------------------------|---------------------------|-------------------------------------------------|-----------------------------------------|----------------------|
|                         | Average annual yield (kL) | Percentage of total demand supplied by tank (%) | Average number of days with zero supply | Estimated Cost \$/kL |
| Suggested tank size (L) |                           |                                                 |                                         |                      |
| 500                     | 20.37                     | 53.8%                                           | 143.09                                  | 16.45                |
| 1000                    | 24.96                     | 66.0%                                           | 107.65                                  | 8.12                 |
| 1500                    | 27.39                     | 72.4%                                           | 87.59                                   | 7.86                 |
| 2000                    | 28.87                     | 76.3%                                           | 75.81                                   | 7.84                 |
| 2500                    | 29.98                     | 79.3%                                           | 66.28                                   | 7.86                 |
| 3000                    | 30.82                     | 81.5%                                           | 59.01                                   | 7.93                 |
| 3500                    | 31.42                     | 83.1%                                           | 54.08                                   | 8.03                 |
| 4000                    | 31.89                     | 84.3%                                           | 50.40                                   | 8.14                 |
| 4500                    | 32.31                     | 85.4%                                           | 46.89                                   | 8.25                 |
| 5000                    | 32.65                     | 86.3%                                           | 44.47                                   | 8.37                 |

| OUTPUT DATA                           |      |         |
|---------------------------------------|------|---------|
| Rainfall input data years             | 12.0 | yr      |
| Average annual rainfall               | 439  | mm/yr   |
| Tank selection                        |      |         |
| Suggested tank size is approx.        | 2000 | L       |
| Average annual yield                  | 29   | kL/yr   |
| Aver. number of days with zero supply | 76   | days/yr |
| % of total demand supplied by tank    | 76%  |         |

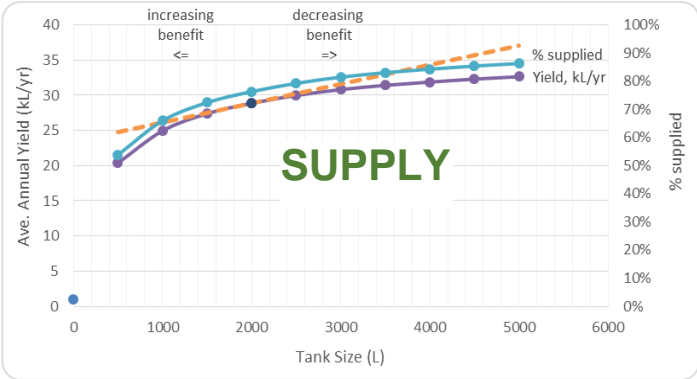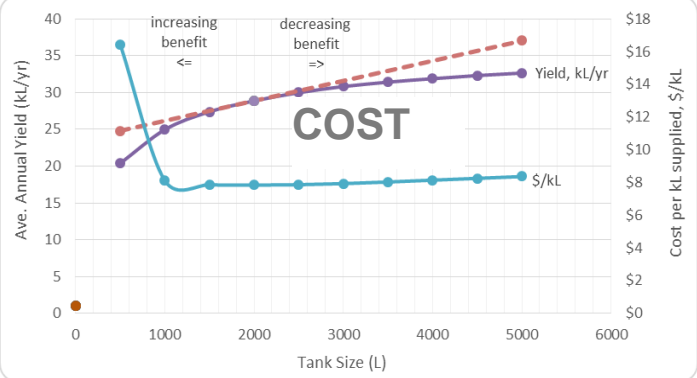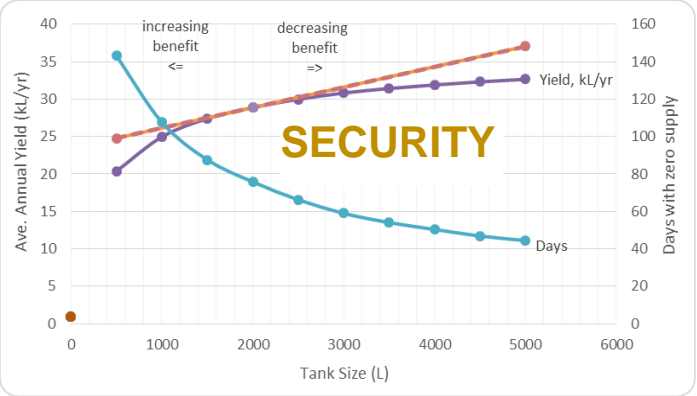

Supplement: s1 [file s1]
