# Supplementary material
Source: MDPI journal article supplement (https://www.mdpi.com/2073-4441/11/4/783)
Supplement: s1 [file s1]

| System No. | 100% planar roof area (m <sup>2</sup> ) | Average hot water use per day (L) | Tank size suggested by the model (L) | Average annual yield (kL/year) | Average number of days with zero supply (days/year) | Percentage of total demand supplied by tank (%) | Estimated cost (\$/kL) |
|------------|-----------------------------------------|-----------------------------------|--------------------------------------|--------------------------------|-----------------------------------------------------|-------------------------------------------------|------------------------|
| RRH 1      | 151.7                                   | 53.3                              | 2000                                 | 18.0                           | 28.2                                                | 92%                                             | 12.5                   |
|            |                                         |                                   | 1000                                 | 16.5                           | 54.1                                                | 84%                                             | 12.3                   |
| RRH 2      | 133.9                                   | 122.2                             | 2000                                 | 31.6                           | 93.1                                                | 71%                                             | 7.2                    |
|            |                                         |                                   | 2000                                 | 31.6                           | 93.1                                                | 71%                                             | 7.2                    |
| RRH 3      | 177.5                                   | 233.6                             | 2000                                 | 47.1                           | 135.6                                               | 55%                                             | 4.8                    |
|            |                                         |                                   | 2500                                 | 49.6                           | 127.8                                               | 58%                                             | 4.8                    |
| RRH 4      | 164.5                                   | 69.3                              | 2000                                 | 22.4                           | 40.5                                                | 88%                                             | 10.1                   |
|            |                                         |                                   | 1500                                 | 21.5                           | 51.6                                                | 85%                                             | 10.0                   |
| RRH 5      | 184.8                                   | 159.4                             | 2000                                 | 39.7                           | 101.1                                               | 68%                                             | 5.7                    |
|            |                                         |                                   | 2500                                 | 41.5                           | 91.2                                                | 71%                                             | 5.7                    |
