# Supplementary material
Source: MDPI journal article supplement (https://www.mdpi.com/2073-4441/11/4/783)
Supplement: s1 [file s1]

| System No. | Estimated roof catchment area (m <sup>2</sup> ) | Average hot water use per day (L) | Tank size suggested by the model (L) | Average annual yield (kL/year) | Average number of days with zero supply (days/year) | Percentage of total demand supplied by tank (%) | Estimated cost (\$/kL) |
|------------|-------------------------------------------------|-----------------------------------|--------------------------------------|--------------------------------|-----------------------------------------------------|-------------------------------------------------|------------------------|
| RRH 1      | 138.6                                           | 53.3                              | 2000                                 | 17.9                           | 29.8                                                | 91%                                             | 12.6                   |
|            |                                                 |                                   | 1000                                 | 16.3                           | 55.9                                                | 83%                                             | 12.4                   |
| RRH 2      | 72.2                                            | 122.2                             | 2000                                 | 25.3                           | 130.4                                               | 57%                                             | 8.9                    |
|            |                                                 |                                   | 2000                                 | 25.3                           | 130.4                                               | 57%                                             | 8.9                    |
| RRH 3      | 130.5                                           | 233.6                             | 2000                                 | 41.5                           | 150.0                                               | 49%                                             | 5.5                    |
|            |                                                 |                                   | 1500                                 | 38.5                           | 158.2                                               | 45%                                             | 5.6                    |
| RRH 4      | 94.1                                            | 69.3                              | 2000                                 | 20.7                           | 58.9                                                | 82%                                             | 10.9                   |
|            |                                                 |                                   | 1500                                 | 19.8                           | 70.8                                                | 78%                                             | 10.9                   |
| RRH 5      | 113.8                                           | 159.4                             | 2000                                 | 34.1                           | 126.0                                               | 59%                                             | 6.6                    |
|            |                                                 |                                   | 2500                                 | 35.6                           | 118.9                                               | 61%                                             | 6.6                    |
