# Supplementary material
Source: MDPI journal article supplement (https://www.mdpi.com/2073-4441/11/4/783)
Supplement: s1 [file s1]

| System No. | 100% planar roof area (m <sup>2</sup> ) | Average total water use per day (L) | Tank size suggested by the model (L) | Average annual yield (kL/year) | Average number of days with zero supply (days/year) | Percentage of total demand supplied by tank (%) | Estimated cost (\$/kL) |
|------------|-----------------------------------------|-------------------------------------|--------------------------------------|--------------------------------|-----------------------------------------------------|-------------------------------------------------|------------------------|
| RRH 1      | 151.7                                   | 103.3                               | 2000                                 | 29.0                           | 72.0                                                | 78%                                             | 7.7                    |
|            |                                         |                                     | 2000                                 | 29.4                           | 72.0                                                | 78%                                             | 7.7                    |
| RRH 2      | 133.9                                   | 289.2                               | 2000                                 | 44.4                           | 164.0                                               | 42%                                             | 5.1                    |
|            |                                         |                                     | 3000                                 | 48.7                           | 154.3                                               | 46%                                             | 5.0                    |
| RRH 3      | 177.5                                   | 565.6                               | 2000                                 | 59.5                           | 189.2                                               | 29%                                             | 3.8                    |
|            |                                         |                                     | 3000                                 | 65.6                           | 183.0                                               | 32%                                             | 3.8                    |
| RRH 4      | 164.5                                   | 223.0                               | 2000                                 | 45.1                           | 135.2                                               | 55%                                             | 5.0                    |
|            |                                         |                                     | 2500                                 | 47.3                           | 128.1                                               | 58%                                             | 5.0                    |
| RRH 5      | 184.8                                   | 343.1                               | 2000                                 | 54.1                           | 162.7                                               | 43%                                             | 4.2                    |
|            |                                         |                                     | 3500                                 | 62.2                           | 147.2                                               | 50%                                             | 4.1                    |
