# Supplementary material
Source: MDPI journal article supplement (https://www.mdpi.com/2073-4441/11/4/783)
Supplement: s1 [file s1]

| System No. | 80% planar roof area (m <sup>2</sup> ) | Average hot water use per day (L) | Tank size suggested by the model (L) | Average annual yield (kL/year) | Average number of days with zero supply (days/year) | Percentage of total demand supplied by tank (%) | Estimated cost (\$/kL) |
|------------|----------------------------------------|-----------------------------------|--------------------------------------|--------------------------------|-----------------------------------------------------|-------------------------------------------------|------------------------|
| RRH 1      | 121.3                                  | 53.3                              | 2000                                 | 17.7                           | 33.2                                                | 90%                                             | 12.7                   |
|            |                                        |                                   | 1500                                 | 17.2                           | 42.1                                                | 88%                                             | 12.5                   |
| RRH 2      | 107.1                                  | 122.2                             | 1500                                 | 28.0                           | 115.5                                               | 63%                                             | 7.7                    |
|            |                                        |                                   | 2000                                 | 29.5                           | 106.0                                               | 66%                                             | 7.7                    |
| RRH 3      | 142.0                                  | 233.6                             | 2000                                 | 43.0                           | 146.8                                               | 50%                                             | 5.3                    |
|            |                                        |                                   | 3000                                 | 47.0                           | 134.7                                               | 55%                                             | 5.2                    |
| RRH 4      | 131.6                                  | 69.3                              | 2000                                 | 21.9                           | 46.0                                                | 86%                                             | 10.3                   |
|            |                                        |                                   | 1500                                 | 21.0                           | 57.6                                                | 82%                                             | 10.3                   |
| RRH 5      | 147.8                                  | 159.4                             | 2000                                 | 37.4                           | 111.3                                               | 64%                                             | 6.1                    |
|            |                                        |                                   | 2000                                 | 37.4                           | 111.3                                               | 64%                                             | 6.1                    |
