# Supplementary material
Source: MDPI journal article supplement (https://www.mdpi.com/2073-4441/11/4/783)
Supplement: s1 [file s1]

| System No. | 80% planar roof area (m <sup>2</sup> ) | Average total water use per day (L) | Tank size suggested by the model (L) | Average annual yield (kL/year) | Average number of days with zero supply (days/year) | Percentage of total demand supplied by tank (%) | Estimated cost (\$/kL) |
|------------|----------------------------------------|-------------------------------------|--------------------------------------|--------------------------------|-----------------------------------------------------|-------------------------------------------------|------------------------|
| RRH 1      | 121.3                                  | 103.3                               | 2000                                 | 28.0                           | 82.4                                                | 74%                                             | 8.1                    |
|            |                                        |                                     | 2000                                 | 28.0                           | 82.4                                                | 74%                                             | 8.1                    |
| RRH 2      | 107.1                                  | 289.2                               | 2000                                 | 39.4                           | 171.9                                               | 37%                                             | 5.8                    |
|            |                                        |                                     | 2500                                 | 41.2                           | 167.7                                               | 39%                                             | 5.7                    |
| RRH 3      | 142.0                                  | 565.6                               | 2000                                 | 52.1                           | 193.2                                               | 25%                                             | 4.4                    |
|            |                                        |                                     | 2500                                 | 54.5                           | 190.8                                               | 26%                                             | 4.4                    |
| RRH 4      | 131.6                                  | 223.0                               | 2000                                 | 40.9                           | 146.7                                               | 50%                                             | 5.5                    |
|            |                                        |                                     | 3000                                 | 44.7                           | 134.6                                               | 55%                                             | 5.5                    |
| RRH 5      | 147.8                                  | 343.1                               | 2000                                 | 48.6                           | 170.8                                               | 39%                                             | 4.7                    |
|            |                                        |                                     | 3500                                 | 55.4                           | 158.2                                               | 44%                                             | 4.6                    |
