# Supplementary material
Source: MDPI journal article supplement (https://www.mdpi.com/2073-4441/11/4/783)
Supplement: s1 [file s1]

| System No. | Estimated roof catchment area (m <sup>2</sup> ) | Average total water use per day (L) | Tank size suggested by the model (L) | Average annual yield (kL/year) | Average number of days with zero supply (days/year) | Percentage of total demand supplied by tank (%) | Estimated cost (\$/kL) |
|------------|-------------------------------------------------|-------------------------------------|--------------------------------------|--------------------------------|-----------------------------------------------------|-------------------------------------------------|------------------------|
| RRH 1      | 138.6                                           | 103.3                               | 2000                                 | 28.9                           | 75.8                                                | 76.3%                                           | 7.84                   |
|            |                                                 |                                     | 2000                                 | 28.9                           | 75.8                                                | 76.3%                                           | 7.84                   |
| RRH 2      | 72.2                                            | 289.2                               | 2000                                 | 29.7                           | 187.1                                               | 28.1%                                           | 7.63                   |
|            |                                                 |                                     | 1500                                 | 28.5                           | 189.6                                               | 26.9%                                           | 7.57                   |
| RRH 3      | 130.5                                           | 565.6                               | 2000                                 | 49.4                           | 194.3                                               | 23.9%                                           | 4.60                   |
|            |                                                 |                                     | 2000                                 | 49.4                           | 194.3                                               | 23.9%                                           | 4.60                   |
| RRH 4      | 94.1                                            | 223.0                               | 2000                                 | 34.6                           | 162.1                                               | 42.5%                                           | 6.55                   |
|            |                                                 |                                     | 2500                                 | 36.1                           | 157.7                                               | 44.3%                                           | 6.54                   |
| RRH 5      | 113.8                                           | 343.1                               | 2000                                 | 42.1                           | 179.6                                               | 33.6%                                           | 5.39                   |
|            |                                                 |                                     | 2500                                 | 44.0                           | 176.0                                               | 35.1%                                           | 5.37                   |
