# Supplementary material
Source: MDPI journal article supplement (https://www.mdpi.com/2073-4441/11/4/783)

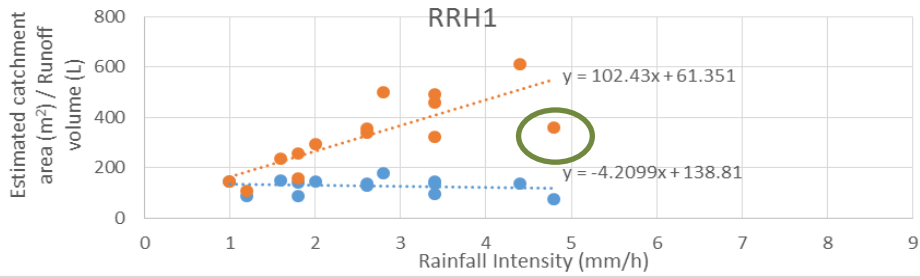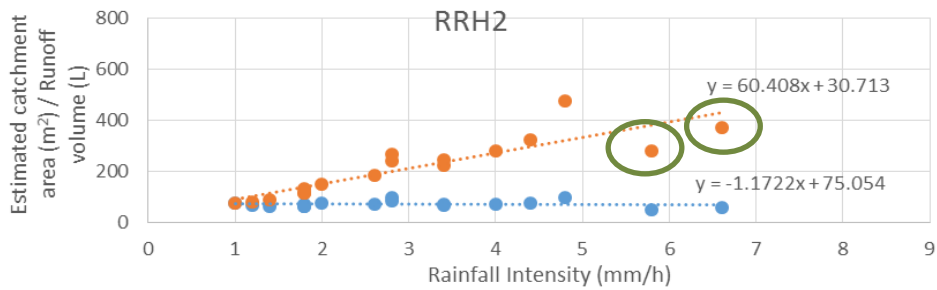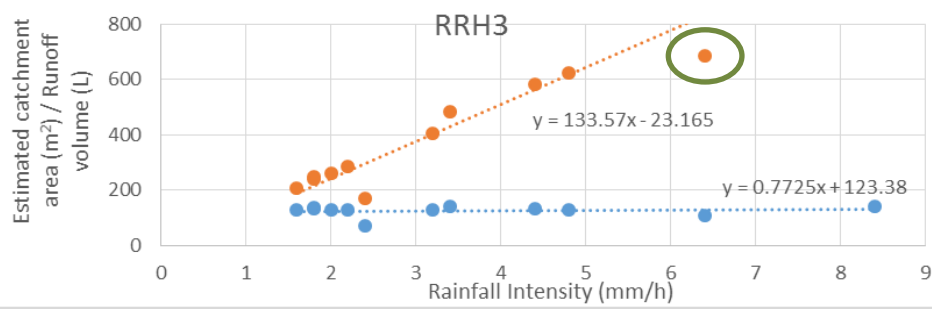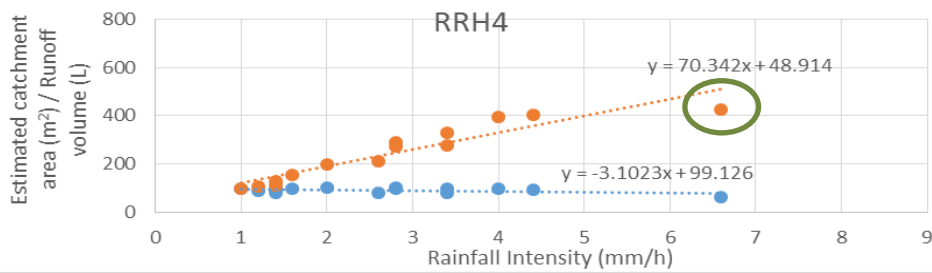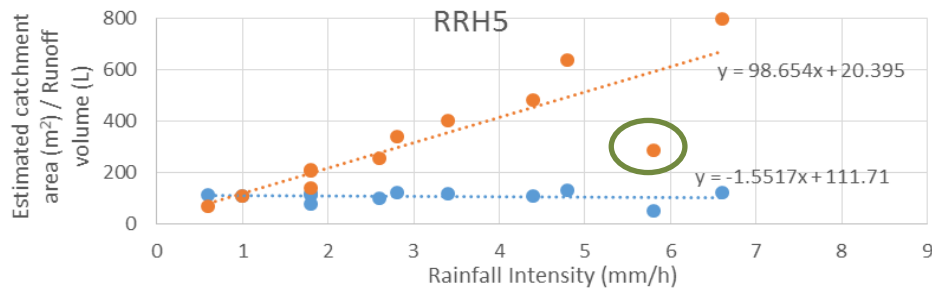

- Estimated catchment area ( $\text{m}^2$ )
- Runoff volume (L)
- ..... Linear (Estimated catchment area ( $\text{m}^2$ ))

Supplement: s1 [file s1]

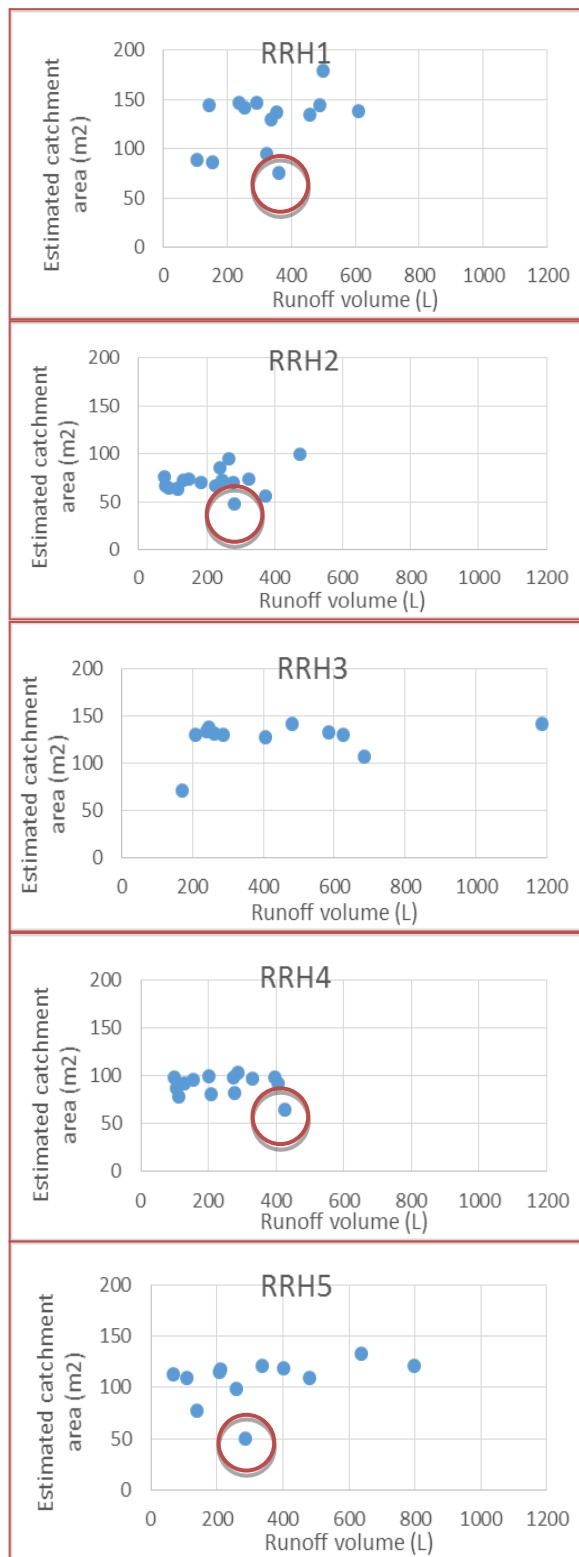

(a)

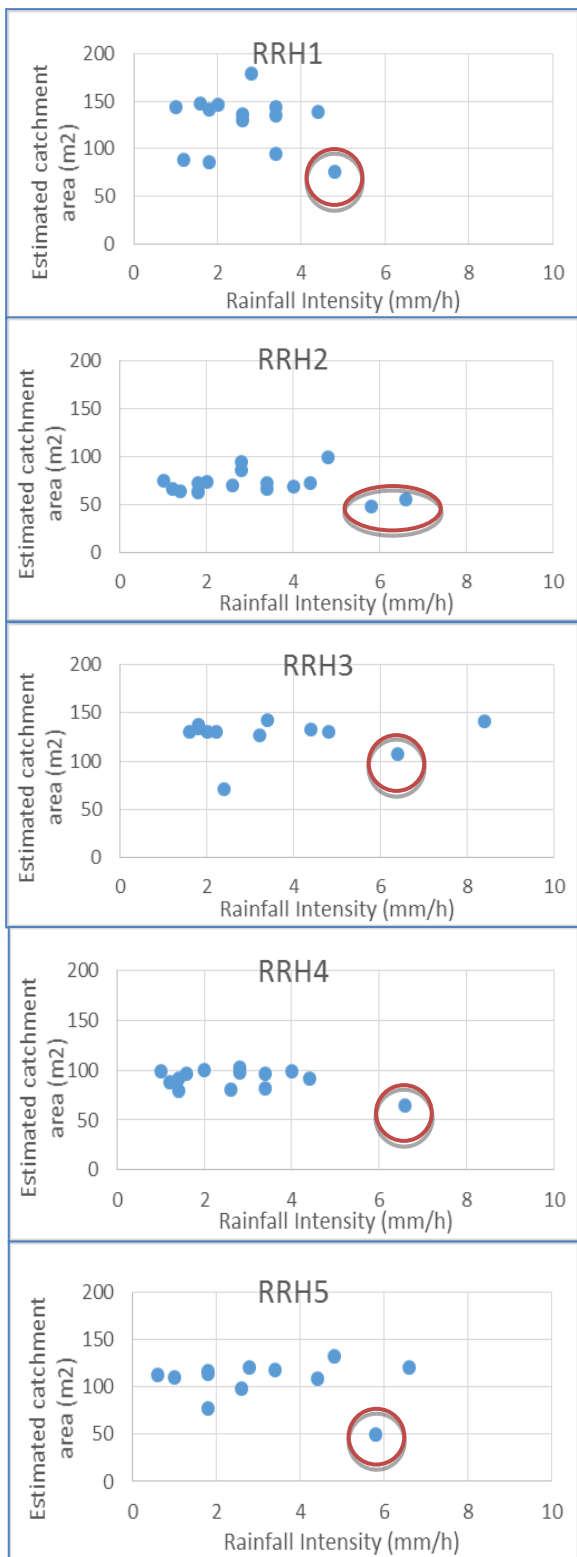

(b)

Supplement: s1 [file s1]
